# Supplementary material for: Acute Kidney Injury: It's as easy as ABCDE
Source: PubMed Central journal article supplement — BMJ Qual Improv Rep. 2012 Dec 18;1(1):u200370.w326. doi: 10.1136/bmjquality.u200370.w326 (PMC4652678; doi:10.1136/bmjquality.u200370.w326), 2012-12-18
Supplement: bmjqir.u200370.w326-s1.pdf [file bmjqir.u200370.w326-s1.pdf]

## Run Chart Illustrating Recognition of Acute Kidney Injury and Action Taken

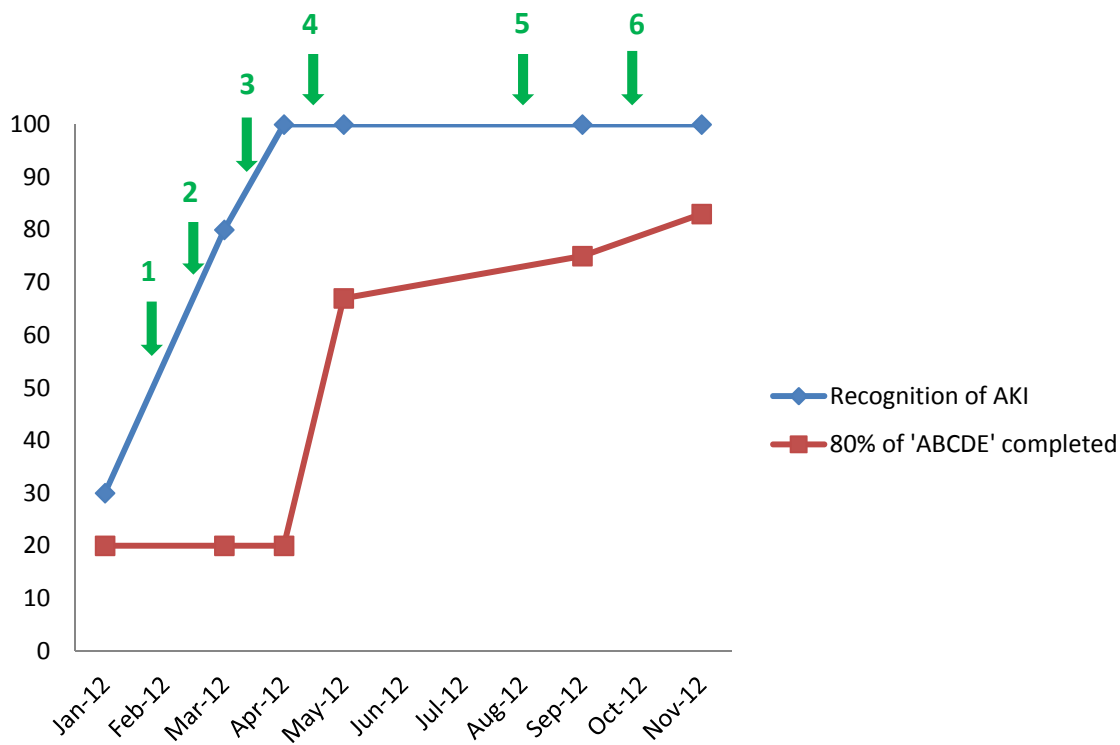

Run 1: Teaching on AKI at Trust wide induction programme for junior doctors

Run 2: Education sessions for nurses, nursing auxiliaries, pharmacists and junior doctors on pilot ward

Run 3: Introduction of ABCDE checklist on pilot ward

Run 4: Reinforcement of all recognition and action steps with the multi-disciplinary team on pilot ward

Run 5: Introduction of project across the surgical directorate

Run 6: Introduction of project on medical admissions unit

### Acute Kidney Injury

#### Warning Signs

- Rise in Cr by 26µmol/l
- Urine output < 500ml in 24h
- Systolic BP < 90mmHg

#### Action

- Address medications
- Boost blood pressure
- Calculate fluid balance
- Dip urine
- Exclude obstruction

Acute Kidney Injury Project ward poster
